# Supplementary material for: Cyathea gigantea (Cyatheaceae) as an antimicrobial agent against multidrug resistant organisms
Source: PubMed Central journal article supplement (PMC6805519; doi:10.1186/s12906-019-2696-0), 2019-10-22
Supplement: 12906_2019_2696_MOESM1_ESM.pdf [file 12906_2019_2696_MOESM1_ESM.pdf]

D:\GCMS\GCMS METHOD\Organic\Extract.qgm

## Method

[Comment]

===== Analytical Line 1 =====

[AOC-20i+s]

# of Rinses with Presolvent :5  
 # of Rinses with Solvent(post) :8  
 # of Rinses with Sample :2  
 Plunger Speed(Suction) :High  
 Viscosity Comp. Time :0.2 sec  
 Plunger Speed(Injection) :High  
 Syringe Insertion Speed :High  
 Injection Mode :Normal  
 Pumping Times :5  
 Inj. Port Dwell Time :0.0 sec  
 Terminal Air Gap :No  
 Plunger Washing Speed :High  
 Washing Volume :6uL  
 Syringe Suction Position :0.0 mm  
 Syringe Injection Position :0.0 mm  
 Solvent Selection :All A,B,C

[GC-2010]

Column Oven Temp. :60.0 °C  
 Injection Temp. :260.00 °C  
 Injection Mode :Split  
 Flow Control Mode :Linear Velocity  
 Pressure :73.2 kPa  
 Total Flow :16.3 mL/min  
 Column Flow :1.21 mL/min  
 Linear Velocity :40.1 cm/sec  
 Purge Flow :3.0 mL/min  
 Split Ratio :10.0  
 High Pressure Injection :OFF  
 Carrier Gas Saver :OFF  
 Splitter Hold :OFF  
 Oven Temp. Program

| Rate  | Temperature(°C) | Hold Time(min) |
|-------|-----------------|----------------|
| -     | 60.0            | 2.00           |
| 7.00  | 250.0           | 0.00           |
| 15.00 | 280.0           | 29.00          |

&lt; Ready Check Heat Unit &gt;

Column Oven : Yes  
 SPL1 : Yes  
 MS : Yes

&lt; Ready Check Detector(FTD) &gt;

&lt; Ready Check Baseline Drift &gt;

&lt; Ready Check Injection Flow &gt;

SPL1 Carrier : Yes  
 SPL1 Purge : Yes

&lt; Ready Check APC Flow &gt;

&lt; Ready Check Detector APC Flow &gt;

External Wait :No  
 Equilibrium Time :1.0 min

[GC Program]

[GCMS-QP2010 Ultra]

IonSourceTemp :230.00 °C  
 Interface Temp. :270.00 °C  
 Solvent Cut Time :4.50 min  
 Detector Gain Mode :Relative  
 Detector Gain :+0.00 kV  
 Threshold :1000

[MS Table]

--Group 1 - Event 1--  
 Start Time :5.00min  
 End Time :60.13min  
 ACQ Mode :Scan  
 Event Time :0.20sec  
 Scan Speed :3333  
 Start m/z :40.00  
 End m/z :650.00

Sample Inlet Unit :GC

[MS Program]

Use MS Program :OFF
